# Supplementary material for: Identification of Breast Cancer Stem Cell Related Genes Using Functional Cellular Assays Combined With Single-Cell RNA Sequencing in MDA-MB-231 Cells
Source: Front Genet. 2019 May 22;10:500. doi: 10.3389/fgene.2019.00500 (PMC6541172; doi:10.3389/fgene.2019.00500)
Supplement: Supplementary file 2 [file Table_2.xlsx]

## Sheet: Cluster A vs Cluster B
Table S2. Top 100 significantly enriched gene sets (FDR q<0.05) among genes significantly regulated between cluster A and cluster B, assessed using MSigDB
Cluster A vs Cluster B
Hallmark		Reactome		KEGG		Transcription factor targets
Matching gene sets	-log10(q)	Matching gene sets	-log10(q)	Matching gene sets	-log10(q)	Matching gene sets	-log10(q)
G2M_CHECKPOINT	38.5513	CELL_CYCLE	23.6308	CELL_CYCLE	5.54668	GATTGGY_NFY_Q6_01	7.31426
E2F_TARGETS	33	CELL_CYCLE_MITOTIC	18.5768	OOCYTE_MEIOSIS	3.28067	GGGCGGR_SP1_Q6	6.67366
MITOTIC_SPINDLE	18.762	DNA_REPLICATION	11.4123	P53_SIGNALING_PATHWAY	1.52143	NFY_Q6_01	4.5544
SPERMATOGENESIS	8.04431	MITOTIC_M_M_G1_PHASES	10.5346	PROGESTERONE_MEDIATED_OOCYTE_MATURATION	1.36653	E2F1_Q4_01	4.02503
GLYCOLYSIS	3.07676	MITOTIC_PROMETAPHASE	10.3028			E2F_Q3_01	4.02503
ESTROGEN_RESPONSE_LATE	2.06956	KINESINS	8.84771			E2F_Q4_01	4.02503
		DEPOSITION_OF_NEW_CENPA_CONTAINING_NUCLEOSOMES_AT_THE_CENTROMERE	6.19997			E2F_Q6_01	4.02503
		CHROMOSOME_MAINTENANCE	6.03621			E2F1_Q3	4.02503
		MHC_CLASS_II_ANTIGEN_PRESENTATION	5.38091			NFY_Q6	3.86967
		ADAPTIVE_IMMUNE_SYSTEM	4.66756			E2F1DP1RB_01	3.14935
		CELL_CYCLE_CHECKPOINTS	4.66756			E2F_Q6	3.14935
		FACTORS_INVOLVED_IN_MEGAKARYOCYTE_DEVELOPMENT_AND_PLATELET_PRODUCTION	4.54516			E2F_Q4	3.14935
		G2_M_CHECKPOINTS	3.80134			E2F_03	3.0716
		IMMUNE_SYSTEM	3.48017			AP1_Q4	2.85699
		APC_C_CDC20_MEDIATED_DEGRADATION_OF_MITOTIC_PROTEINS	3.01954			E2F_Q3	2.26922
		APC_C_CDC20_MEDIATED_DEGRADATION_OF_CYCLIN_B	2.96257			E2F1_Q6	2.26922
		APC_CDC20_MEDIATED_DEGRADATION_OF_NEK2A	2.88941			E2F1DP1_01	2.26922
		REGULATION_OF_MITOTIC_CELL_CYCLE	2.83863			E2F1DP2_01	2.26922
		E2F_MEDIATED_REGULATION_OF_DNA_REPLICATION	2.64397			E2F4DP2_01	2.26922
		E2F_ENABLED_INHIBITION_OF_PRE_REPLICATION_COMPLEX_FORMATION	2.14448			E2F_02	2.26922
		MITOTIC_G1_G1_S_PHASES	2.10127			TGANTCA_AP1_C	2.26922
		CYCLIN_A_B1_ASSOCIATED_EVENTS_DURING_G2_M_TRANSITION	1.82102			E2F4DP1_01	2.26922
		APC_C_CDH1_MEDIATED_DEGRADATION_OF_CDC20_AND_OTHER_APC_C_CDH1_TARGETED_PROTEINS_IN_LATE_MITOSIS_EARLY_G1	1.80967			E2F1_Q4	2.25727
		METABOLISM_OF_NUCLEOTIDES	1.80967			NFY_C	2.25727
		HEMOSTASIS	1.79588			USF2_Q6	2.22621
		TELOMERE_MAINTENANCE	1.79317			AP1FJ_Q2	2.11295
		MITOTIC_G2_G2_M_PHASES	1.7122			CACGTG_MYC_Q2	1.97469
		CONVERSION_FROM_APC_C_CDC20_TO_APC_C_CDH1_IN_LATE_ANAPHASE	1.58838			SGCGSSAAA_E2F1DP2_01	1.93181
		PHOSPHORYLATION_OF_THE_APC_C	1.56384			RCGCANGCGY_NRF1_Q6	1.68613
		INHIBITION_OF_THE_PROTEOLYTIC_ACTIVITY_OF_APC_C_REQUIRED_FOR_THE_ONSET_OF_ANAPHASE_BY_MITOTIC_SPINDLE_CHECKPOINT_COMPONENTS	1.55596			MYAATNNNNNNNGGC_UNKNOWN	1.4045
		PYRIMIDINE_METABOLISM	1.55596			HIF1_Q5	1.37675
		RECYCLING_PATHWAY_OF_L1	1.46725			ARNT_02	1.36552
		G1_S_TRANSITION	1.39469			NFY_01	1.35458
						NRF2_Q4	1.35458
						USF_01	1.35458
						AP2_Q6	1.35458
						AP1_Q2	1.32514
						MYCMAX_B	1.31876
						NMYC_01	1.31247

## Sheet: Cluster A vs Cluster C
Table S2. Top 100 significantly enriched gene sets (FDR q<0.05) among genes significantly regulated between cluster A and cluster C, assessed using MSigDB
Cluster A vs Cluster C
Hallmark		Reactome		KEGG		Transcription factor targets
Matching gene sets	-log10(q)	Matching gene sets	-log10(q)	Matching gene sets	-log10(q)	Matching gene sets	-log10(q)
E2F_TARGETS	41.4123	CELL_CYCLE	20.7825	CELL_CYCLE	8.86646	GGGCGGR_SP1_Q6	14.3307
G2M_CHECKPOINT	31.9957	CELL_CYCLE_MITOTIC	16.7747	OOCYTE_MEIOSIS	5.86328	CAGGTG_E12_Q6	10.5952
MITOTIC_SPINDLE	21.6946	MITOTIC_M_M_G1_PHASES	12.2541	PROGESTERONE_MEDIATED_OOCYTE_MATURATION	4.51145	GATTGGY_NFY_Q6_01	8.58336
APOPTOSIS	7.67778	DNA_REPLICATION	11.6234	PYRIMIDINE_METABOLISM	3.09474	GGGAGGRR_MAZ_Q6	8.56067
EPITHELIAL_MESENCHYMAL_TRANSITION	6.93554	MITOTIC_PROMETAPHASE	11.0458	PURINE_METABOLISM	2.96257	CAGCTG_AP4_Q5	6.6925
IL2_STAT5_SIGNALING	6.93554	METABOLISM_OF_NUCLEOTIDES	7.57675	P53_SIGNALING_PATHWAY	2.91364	NFY_Q6	6.54975
MYC_TARGETS_V1	6.93554	REGULATION_OF_MITOTIC_CELL_CYCLE	6.98716	ECM_RECEPTOR_INTERACTION	2.56864	TTANTCA_UNKNOWN	6.50031
ANDROGEN_RESPONSE	5.03339	CELL_CYCLE_CHECKPOINTS	6.8041	RIBOSOME	2.53611	TATAAA_TATA_01	5.96257
GLYCOLYSIS	5.0048	HEMOSTASIS	6.22257	GAP_JUNCTION	2.53611	CACGTG_MYC_Q2	5.96257
SPERMATOGENESIS	4.29328	APC_C_CDC20_MEDIATED_DEGRADATION_OF_MITOTIC_PROTEINS	4.9914	REGULATION_OF_ACTIN_CYTOSKELETON	1.62709	TGGAAA_NFAT_Q4_01	5.96257
MTORC1_SIGNALING	4.21538	G2_M_CHECKPOINTS	4.9914	PATHWAYS_IN_CANCER	1.40894	AP1FJ_Q2	5.72584
P53_PATHWAY	4.21538	KINESINS	4.9914	GLUTATHIONE_METABOLISM	1.39254	AP1_Q4	5.72584
XENOBIOTIC_METABOLISM	4.21538	CHROMOSOME_MAINTENANCE	4.68403			BACH2_01	5.72584
COAGULATION	3.43652	CYCLIN_A_B1_ASSOCIATED_EVENTS_DURING_G2_M_TRANSITION	4.2636			CTTTGT_LEF1_Q2	5.71444
COMPLEMENT	3.43652	E2F_MEDIATED_REGULATION_OF_DNA_REPLICATION	4.22475			RYTTCCTG_ETS2_B	5.15864
HYPOXIA	3.43652	G1_S_TRANSITION	3.90309			NFY_01	5.14935
MYOGENESIS	3.43652	IMMUNE_SYSTEM	3.73755			NFY_Q6_01	5.00833
FATTY_ACID_METABOLISM	3.16622	MITOTIC_G2_G2_M_PHASES	3.66555			TGANTCA_AP1_C	5
MYC_TARGETS_V2	3.11407	PYRIMIDINE_METABOLISM	3.52143			TTGTTT_FOXO4_01	4.91009
APICAL_JUNCTION	2.7122	MITOTIC_G1_G1_S_PHASES	3.44009			GGATTA_PITX2_Q2	4.50031
KRAS_SIGNALING_UP	2.7122	MHC_CLASS_II_ANTIGEN_PRESENTATION	3.44009			CTGCAGY_UNKNOWN	4.41341
OXIDATIVE_PHOSPHORYLATION	2.7122	APOPTOTIC_EXECUTION_PHASE	3.4389			CEBP_C	4.31876
INTERFERON_ALPHA_RESPONSE	2.35655	APC_CDC20_MEDIATED_DEGRADATION_OF_NEK2A	3.3279			YTATTTTNR_MEF2_02	4.31876
ALLOGRAFT_REJECTION	2.03339	E2F_ENABLED_INHIBITION_OF_PRE_REPLICATION_COMPLEX_FORMATION	3.27819			AP1_Q6	4.31515
ESTROGEN_RESPONSE_LATE	2.03339	PURINE_RIBONUCLEOSIDE_MONOPHOSPHATE_BIOSYNTHESIS	3.15927			BACH1_01	4.29073
INTERFERON_GAMMA_RESPONSE	2.03339	DEPOSITION_OF_NEW_CENPA_CONTAINING_NUCLEOSOMES_AT_THE_CENTROMERE	3.14874			HNF4_Q6	4.29073
TNFA_SIGNALING_VIA_NFKB	2.03339	PURINE_METABOLISM	3.11976			TCANNTGAY_SREBP1_01	4.22915
PROTEIN_SECRETION	1.54821	RECRUITMENT_OF_MITOTIC_CENTROSOME_PROTEINS_AND_COMPLEXES	3.11976			USF_C	4.11862
ANGIOGENESIS	1.54363	METABOLISM_OF_PROTEINS	3.11976			RCGCANGCGY_NRF1_Q6	4.11862
UNFOLDED_PROTEIN_RESPONSE	1.4034	ADAPTIVE_IMMUNE_SYSTEM	2.97881			TGTTTGY_HNF3_Q6	4.11862
ESTROGEN_RESPONSE_EARLY	1.4034	APC_C_CDH1_MEDIATED_DEGRADATION_OF_CDC20_AND_OTHER_APC_C_CDH1_TARGETED_PROTEINS_IN_LATE_MITOSIS_EARLY_G1	2.97881			CTTTAAR_UNKNOWN	3.7986
		APOPTOTIC_CLEAVAGE_OF_CELLULAR_PROTEINS	2.84466			USF2_Q6	3.66555
		METABOLISM_OF_LIPIDS_AND_LIPOPROTEINS	2.82102			HEN1_01	3.59346
		UNFOLDED_PROTEIN_RESPONSE	2.7986			MEF2_01	3.55129
		FACTORS_INVOLVED_IN_MEGAKARYOCYTE_DEVELOPMENT_AND_PLATELET_PRODUCTION	2.75696			AP1_Q6_01	3.53165
		AMYLOIDS	2.75696			AP1_Q2	3.53018
		DIABETES_PATHWAYS	2.75696			IK2_01	3.51713
		G1_S_SPECIFIC_TRANSCRIPTION	2.5867			MYCMAX_B	3.5157
		APOPTOSIS	2.52578			NMYC_01	3.4908
		PHOSPHORYLATION_OF_THE_APC_C	2.3536			HNF3ALPHA_Q6	3.4908
		INHIBITION_OF_THE_PROTEOLYTIC_ACTIVITY_OF_APC_C_REQUIRED_FOR_THE_ONSET_OF_ANAPHASE_BY_MITOTIC_SPINDLE_CHECKPOINT_COMPONENTS	2.30803			IK1_01	3.42366
		LOSS_OF_NLP_FROM_MITOTIC_CENTROSOMES	2.30016			WYAAANNRNNNGCG_UNKNOWN	3.36452
		FATTY_ACID_TRIACYLGLYCEROL_AND_KETONE_BODY_METABOLISM	2.27165			SRF_Q4	3.33442
		APC_C_CDC20_MEDIATED_DEGRADATION_OF_CYCLIN_B	2.23359			CTAWWWATA_RSRFC4_Q2	3.33348
		METABOLISM_OF_CARBOHYDRATES	2.17393			GGGTGGRR_PAX4_03	3.33348
		MEIOSIS	2.17393			WTGAAAT_UNKNOWN	3.27737
		SRP_DEPENDENT_COTRANSLATIONAL_PROTEIN_TARGETING_TO_MEMBRANE	2.16431			E2F1_Q4_01	3.27737
		MEIOTIC_SYNAPSIS	2.00524			WGGAATGY_TEF1_Q6	3.20273
		METABOLISM_OF_MRNA	1.85387			E2F_Q3_01	3.20273
		ACTIVATION_OF_ATR_IN_RESPONSE_TO_REPLICATION_STRESS	1.7986			MSX1_01	3.19314
		RECRUITMENT_OF_NUMA_TO_MITOTIC_CENTROSOMES	1.76447			CTTTGA_LEF1_Q2	3.17783
		TRANSLATION	1.72584			USF_Q6_01	3.17718
		RESPONSE_TO_ELEVATED_PLATELET_CYTOSOLIC_CA2_	1.72584			E2F_Q6_01	3.17263
		PEPTIDE_CHAIN_ELONGATION	1.70774			TBP_01	3.11862
		CELL_SURFACE_INTERACTIONS_AT_THE_VASCULAR_WALL	1.70774			ARNT_02	3.08938
		G2_M_DNA_DAMAGE_CHECKPOINT	1.64207			SMTTTTGT_UNKNOWN	3.04096
		ACTIVATION_OF_CHAPERONE_GENES_BY_XBP1S	1.61439			WHN_B	3.03292
		TRANSMEMBRANE_TRANSPORT_OF_SMALL_MOLECULES	1.61261			USF_01	3.01682
		CASPASE_MEDIATED_CLEAVAGE_OF_CYTOSKELETAL_PROTEINS	1.59517			USF_Q6	2.9914
		METABOLISM_OF_RNA	1.57187			MAZ_Q6	2.9914
		INFLUENZA_VIRAL_RNA_TRANSCRIPTION_AND_REPLICATION	1.56864			NF1_Q6	2.97881
		PPARA_ACTIVATES_GENE_EXPRESSION	1.54821			MYOD_01	2.9431
		3_UTR_MEDIATED_TRANSLATIONAL_REGULATION	1.51286			OCT1_01	2.9393
		NONSENSE_MEDIATED_DECAY_ENHANCED_BY_THE_EXON_JUNCTION_COMPLEX	1.51286			AACTTT_UNKNOWN	2.92812
		SIGNALING_BY_EGFR_IN_CANCER	1.49485			OCT1_Q6	2.91009
		GLYCOSAMINOGLYCAN_METABOLISM	1.47366			STAT5A_02	2.91009
		INTEGRATION_OF_PROVIRUS	1.46725			CAGGTA_AREB6_01	2.91009
		GLYCOGEN_BREAKDOWN_GLYCOGENOLYSIS	1.37161			GCCATNTTG_YY1_Q6	2.91009
		RNA_POL_I_RNA_POL_III_AND_MITOCHONDRIAL_TRANSCRIPTION	1.34582			AP4_Q5	2.89963
		POST_CHAPERONIN_TUBULIN_FOLDING_PATHWAY	1.34294			CATTGTYY_SOX9_B1	2.81816
		SYNTHESIS_AND_INTERCONVERSION_OF_NUCLEOTIDE_DI_AND_TRIPHOSPHATES	1.34294			TCCCRNNRTGC_UNKNOWN	2.7986
		INFLUENZA_LIFE_CYCLE	1.30277			RGAANNTTC_HSF1_01	2.78516
						GCANCTGNY_MYOD_Q6	2.78252
						YNGTTNNNATT_UNKNOWN	2.77989
						TGACCTY_ERR1_Q2	2.73049
						WGTTNNNNNAAA_UNKNOWN	2.7167
						PAX6_01	2.71444
						E2F_Q3	2.67162
						YAATNRNNNYNATT_UNKNOWN	2.66756
						HIF1_Q3	2.64782
						E2F_Q6	2.63078
						E2F_Q4	2.61261
						GGGYGTGNY_UNKNOWN	2.61261
						SREBP1_01	2.6073
						NKX61_01	2.6073
						E2F_Q4_01	2.60033
						E2F1_Q6_01	2.60033
						ZF5_01	2.60033
						TCCATTKW_UNKNOWN	2.59346
						OCT1_04	2.57675
						E2F1_Q3	2.56225
						HIF1_Q5	2.56225
						MEF2_Q6_01	2.56225
						MYOD_Q6	2.56225
						RSRFC4_01	2.56225
						S8_01	2.56225
						CREB_Q3	2.49349
						AAAYWAACM_HFH4_01	2.47756
						MYOGENIN_Q6	2.47237
						CREL_01	2.46725

## Sheet: Cluster B vs Cluster C
Table S2. Top 100 significantly enriched gene sets (FDR q<0.05) among genes significantly regulated between cluster B and cluster C, assessed using MSigDB
Cluster B vs Cluster C
Hallmark		Reactome		KEGG		Transcription factor targets
Matching gene sets	-log10(q)	Matching gene sets	-log10(q)	Matching gene sets	-log10(q)	Matching gene sets	-log10(q)
EPITHELIAL_MESENCHYMAL_TRANSITION	11.6655	PLATELET_ACTIVATION_SIGNALING_AND_AGGREGATION	7.7122	RIBOSOME	6.49894	TATAAA_TATA_01	11.0991
HYPOXIA	10.8097	RESPONSE_TO_ELEVATED_PLATELET_CYTOSOLIC_CA2_	7.69037	MAPK_SIGNALING_PATHWAY	2.16178	GGGAGGRR_MAZ_Q6	7.47496
TNFA_SIGNALING_VIA_NFKB	10.8097	TRANSLATION	5.48945	INSULIN_SIGNALING_PATHWAY	2.05061	GGGCGGR_SP1_Q6	6.64207
COAGULATION	8.74715	3_UTR_MEDIATED_TRANSLATIONAL_REGULATION	5.48149	ADHERENS_JUNCTION	2.05061	RTAAACA_FREAC2_01	6.43533
APOPTOSIS	8.18442	NONSENSE_MEDIATED_DECAY_ENHANCED_BY_THE_EXON_JUNCTION_COMPLEX	5.48149			CREB_Q2	5.0575
UV_RESPONSE_DN	7.42366	HEMOSTASIS	5.48149			CAGGTG_E12_Q6	4.67572
COMPLEMENT	7.41908	METABOLISM_OF_PROTEINS	5.01682			CAGCTG_AP4_Q5	4.52578
INFLAMMATORY_RESPONSE	6.36151	PEPTIDE_CHAIN_ELONGATION	4.95078			TTANTCA_UNKNOWN	4.27491
XENOBIOTIC_METABOLISM	6.36151	INFLUENZA_VIRAL_RNA_TRANSCRIPTION_AND_REPLICATION	4.66959			AACTTT_UNKNOWN	4.27491
IL2_STAT5_SIGNALING	5.29158	SRP_DEPENDENT_COTRANSLATIONAL_PROTEIN_TARGETING_TO_MEMBRANE	4.52578			GTGACGY_E4F1_Q6	4.06854
ESTROGEN_RESPONSE_EARLY	4.30892	METABOLISM_OF_RNA	4.45346			CREB_Q4_01	4.06854
MYOGENESIS	4.30892	INFLUENZA_LIFE_CYCLE	4.19246			WGGAATGY_TEF1_Q6	4.00305
TGF_BETA_SIGNALING	3.69037	METABOLISM_OF_MRNA	4.11464			CACGTG_MYC_Q2	4.00305
ALLOGRAFT_REJECTION	3.48545	METABOLISM_OF_LIPIDS_AND_LIPOPROTEINS	3.13668			TGCCAAR_NF1_Q6	3.75203
ESTROGEN_RESPONSE_LATE	3.48545	ACTIVATION_OF_THE_MRNA_UPON_BINDING_OF_THE_CAP_BINDING_COMPLEX_AND_EIFS_AND_SUBSEQUENT_BINDING_TO_43S	3.10902			HIF1_Q5	3.75203
KRAS_SIGNALING_UP	3.48545	FATTY_ACID_TRIACYLGLYCEROL_AND_KETONE_BODY_METABOLISM	2.72354			TBP_01	3.75203
MYC_TARGETS_V1	3.48545	PPARA_ACTIVATES_GENE_EXPRESSION	2.7167			CTTTGT_LEF1_Q2	3.6968
P53_PATHWAY	3.48545	SIGNALING_BY_TGF_BETA_RECEPTOR_COMPLEX	2.4389			NFY_01	3.68825
CHOLESTEROL_HOMEOSTASIS	3.32057	METABOLISM_OF_AMINO_ACIDS_AND_DERIVATIVES	2.37986			ATF_B	3.61261
PROTEIN_SECRETION	2.91009	SMAD2_SMAD3_SMAD4_HETEROTRIMER_REGULATES_TRANSCRIPTION	2.31515			GRE_C	3.61261
ANDROGEN_RESPONSE	2.84771	DIABETES_PATHWAYS	2.3019			CREB_Q4	3.61261
KRAS_SIGNALING_DN	2.66154	PERK_REGULATED_GENE_EXPRESSION	2.27327			MYCMAX_B	3.61261
MTORC1_SIGNALING	2.66154	FORMATION_OF_THE_TERNARY_COMPLEX_AND_SUBSEQUENTLY_THE_43S_COMPLEX	2.27327			GATTGGY_NFY_Q6_01	3.61261
GLYCOLYSIS	1.82974	UNFOLDED_PROTEIN_RESPONSE	2.16178			TGGAAA_NFAT_Q4_01	3.5784
ANGIOGENESIS	1.78781	EXTRACELLULAR_MATRIX_ORGANIZATION	2.05257			YTATTTTNR_MEF2_02	3.44129
WNT_BETA_CATENIN_SIGNALING	1.67572	IRON_UPTAKE_AND_TRANSPORT	2.05257			E4F1_Q6	3.44129
SPERMATOGENESIS	1.56703	TRANSCRIPTIONAL_ACTIVITY_OF_SMAD2_SMAD3_SMAD4_HETEROTRIMER	2			SRF_Q4	3.29243
FATTY_ACID_METABOLISM	1.4034	ACTIVATION_OF_CHAPERONE_GENES_BY_ATF6_ALPHA	1.73993			TGANTCA_AP1_C	3.26201
		ACTIVATION_OF_CHAPERONES_BY_ATF6_ALPHA	1.6038			TEF1_Q6	3.26122
		GLYCOGEN_BREAKDOWN_GLYCOGENOLYSIS	1.33255			GGGTGGRR_PAX4_03	3.15304
		GLUCOSE_METABOLISM	1.30277			TCCATTKW_UNKNOWN	3.13549
						FOXO1_01	3.09474
						MYOD_Q6	3.09474
						MYB_Q3	3.05208
						TAAYNRNNTCC_UNKNOWN	3.04721
						AAAYWAACM_HFH4_01	3.04721
						CREBP1_Q2	3.04721
						MYB_Q6	3.04721
						CREL_01	3.04721
						ATF_01	3.02687
						FREAC2_01	3.02687
						CREB_01	3.02687
						TTF1_Q6	3.02687
						BACH1_01	3.02687
						RYTTCCTG_ETS2_B	3.02687
						YNGTTNNNATT_UNKNOWN	2.97469
						BACH2_01	2.97469
						CTTTAAR_UNKNOWN	2.94692
						MAZ_Q6	2.91364
						TTGTTT_FOXO4_01	2.88606
						WYAAANNRNNNGCG_UNKNOWN	2.88606
						YRCCAKNNGNCGC_UNKNOWN	2.88606
						MGGAAGTG_GABP_B	2.75203
						CTGCAGY_UNKNOWN	2.72125
						SCGGAAGY_ELK1_02	2.66354
						GCANCTGNY_MYOD_Q6	2.62525
						GGGYGTGNY_UNKNOWN	2.6073
						HIF1_Q3	2.5867
						TTCYRGAA_UNKNOWN	2.5867
						ATF1_Q6	2.5867
						TGACGTCA_ATF3_Q6	2.5867
						NKX61_01	2.54516
						TITF1_Q3	2.52288
						GCM_Q2	2.50031
						E2F1_Q3_01	2.45967
						ATF3_Q6	2.45717
						P53_02	2.40894
						TATA_01	2.40671
						CATTGTYY_SOX9_B1	2.4034
						PAX2_02	2.39254
						CREBP1CJUN_01	2.38934
						YGACNNYACAR_UNKNOWN	2.37675
						PAX4_01	2.37572
						TGTTTGY_HNF3_Q6	2.36151
						WTGAAAT_UNKNOWN	2.31966
						NMYC_01	2.31605
						USF_C	2.25571
						CTTTGA_LEF1_Q2	2.17783
						AAANWWTGC_UNKNOWN	2.17718
						FREAC7_01	2.16241
						CEBP_C	2.11862
						HSF_Q6	2.11464
						TGAYRTCA_ATF3_Q6	2.11407
						TGCTGAY_UNKNOWN	2.11407
						HFH8_01	2.11126
						TFIII_Q6	2.09745
						WGTTNNNNNAAA_UNKNOWN	2.08355
						SRF_C	2.05159
						YGCANTGCR_UNKNOWN	2.02733
						SRF_Q5_01	1.98297
						CART1_01	1.93554
						TTCYNRGAA_STAT5B_01	1.92812
						TAXCREB_01	1.91721
						OCT1_03	1.91721
						GATGKMRGCG_UNKNOWN	1.90658
						TTANWNANTGGM_UNKNOWN	1.90658
						AHRARNT_01	1.90309
						CEBP_Q2	1.90309
						MZF1_01	1.88941
						PAX4_02	1.88941
